# Supplementary material
Source: publisher figshare collection journal article supplement (https://karger.figshare.com/ndownloader/files/38311278)
Supplement: Supplementary file 1 [file 38311278]

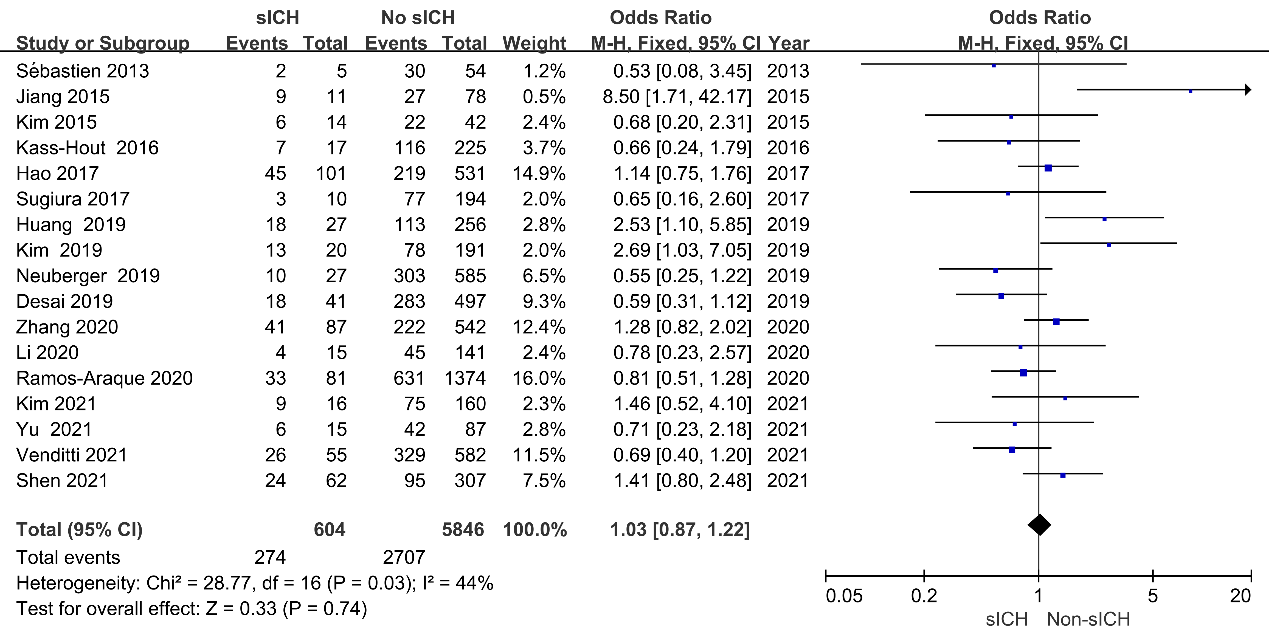

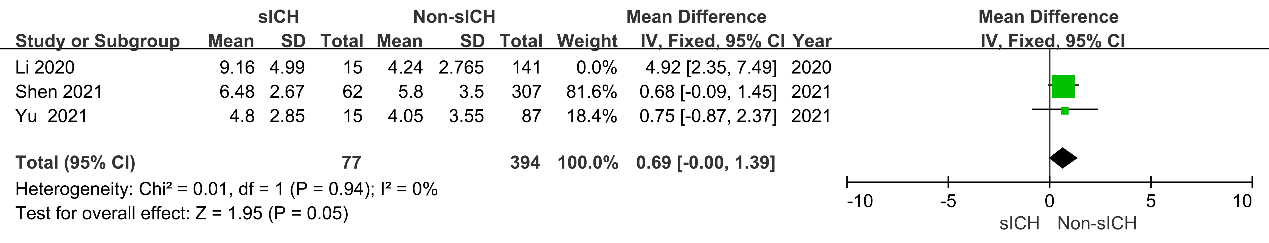

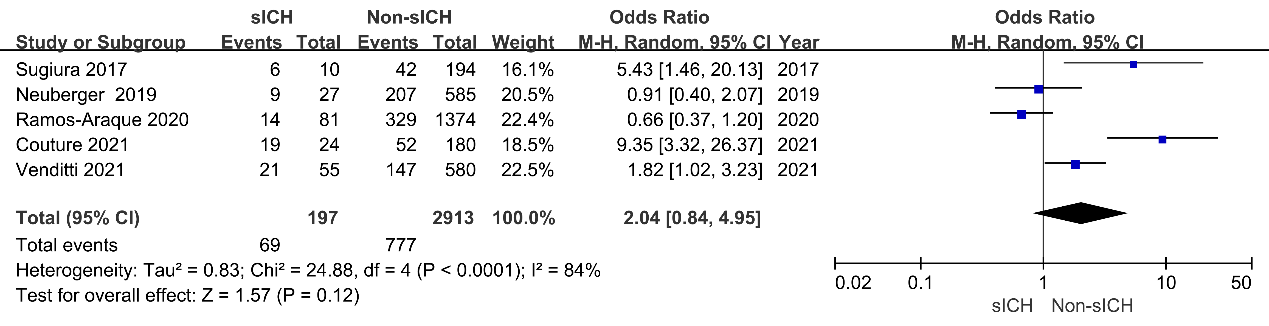

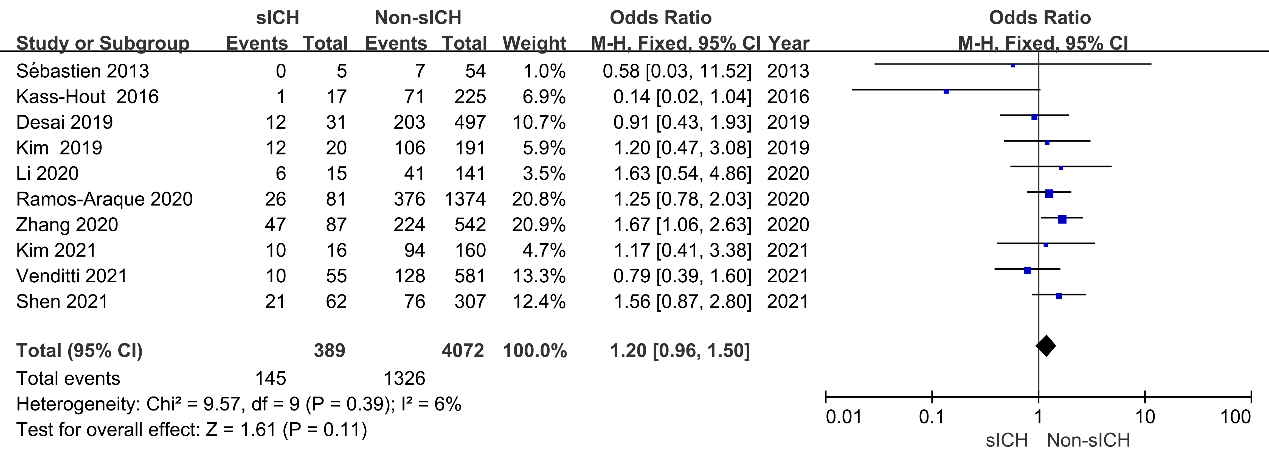

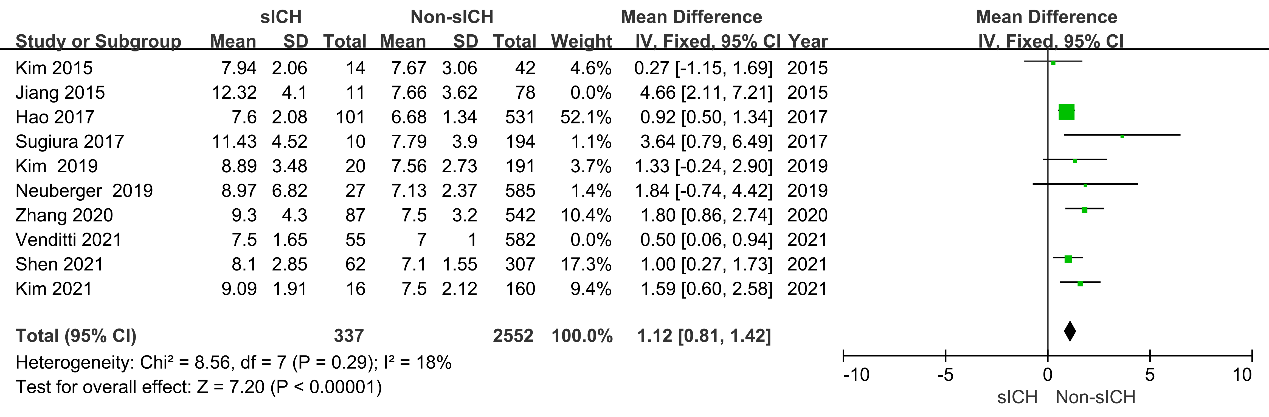


**E**

**D**

**C**

**B**

**A**


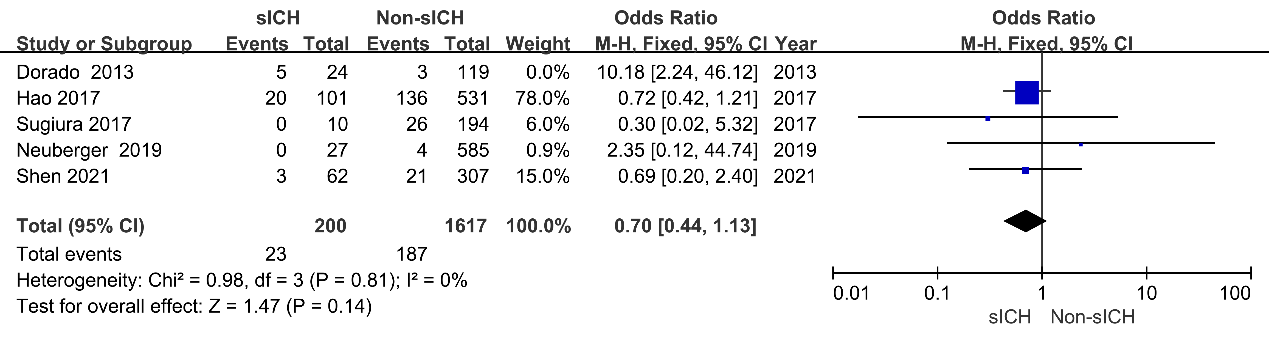

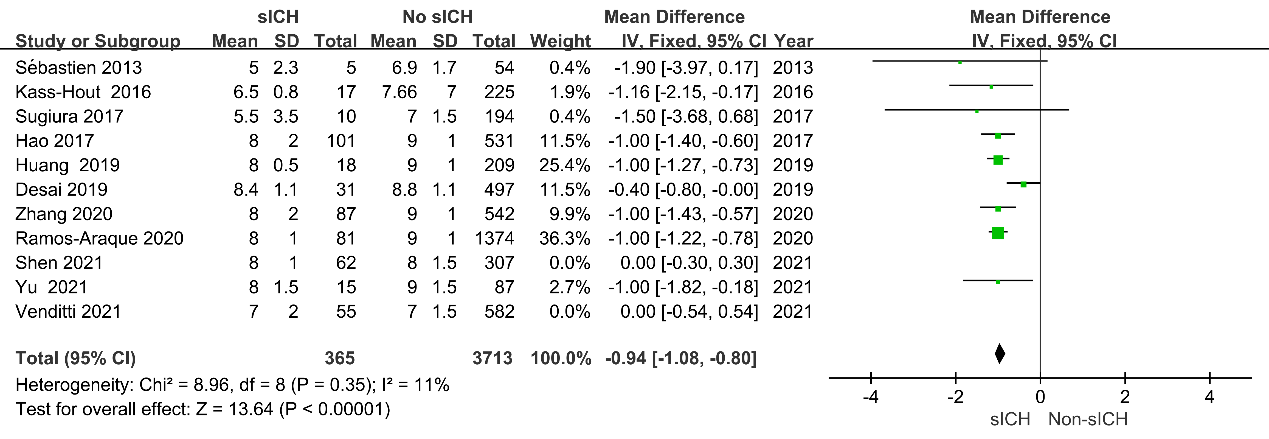

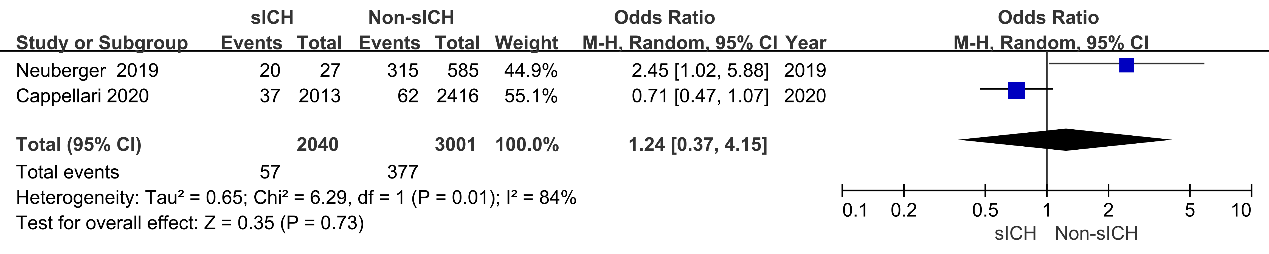

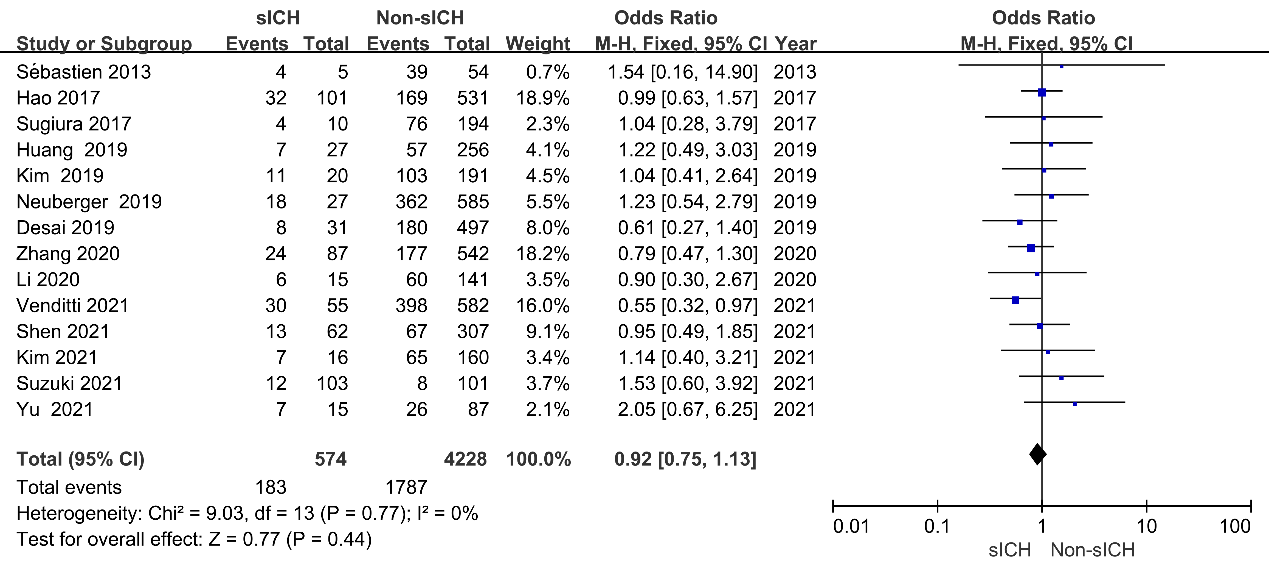

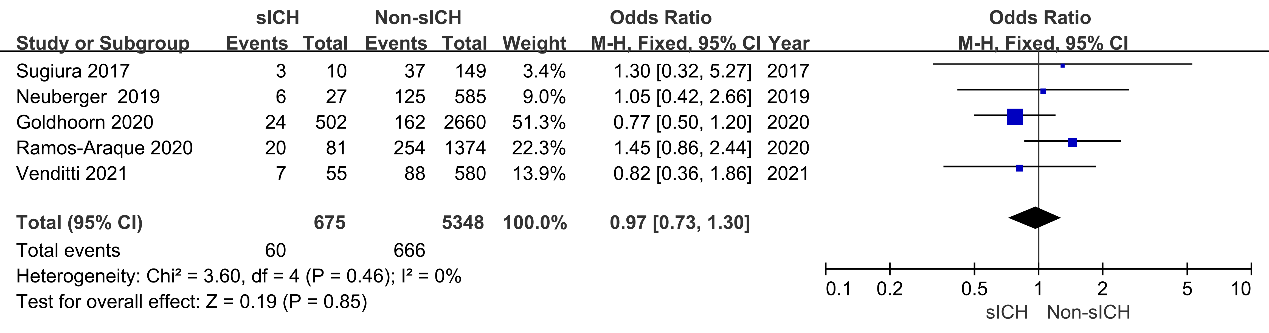


**J**

**I**

**H**

**G**

**F**

**eFigure 2.** **Forest plot of other predictors for sICH after EVT in patients with AIS.** Female gender (A), Initial Serum Glucose (B), Atrial fibrillation (C), Antiplatelet therapy (D), NLR (E), Oral anticoagulants (F), Intravenous thrombolysis (G), General anesthesia (H), Initial ASPECT Score (I), Emergent stenting (J). EVT: Endovascular Thrombectomy; sICH: Symptomatic Intracranial Hemorrhage; AIS: Acute Ischemic Stroke; NLR: Neutrophil-to-Lymphocyte Ratio; ASPECT: Alberta Stroke Program Early CT.
